# Supplementary material
Source: PubMed Central journal article supplement (PMC5360878)
Supplement: cmi201578x1.pdf [file cmi201578x1.pdf]

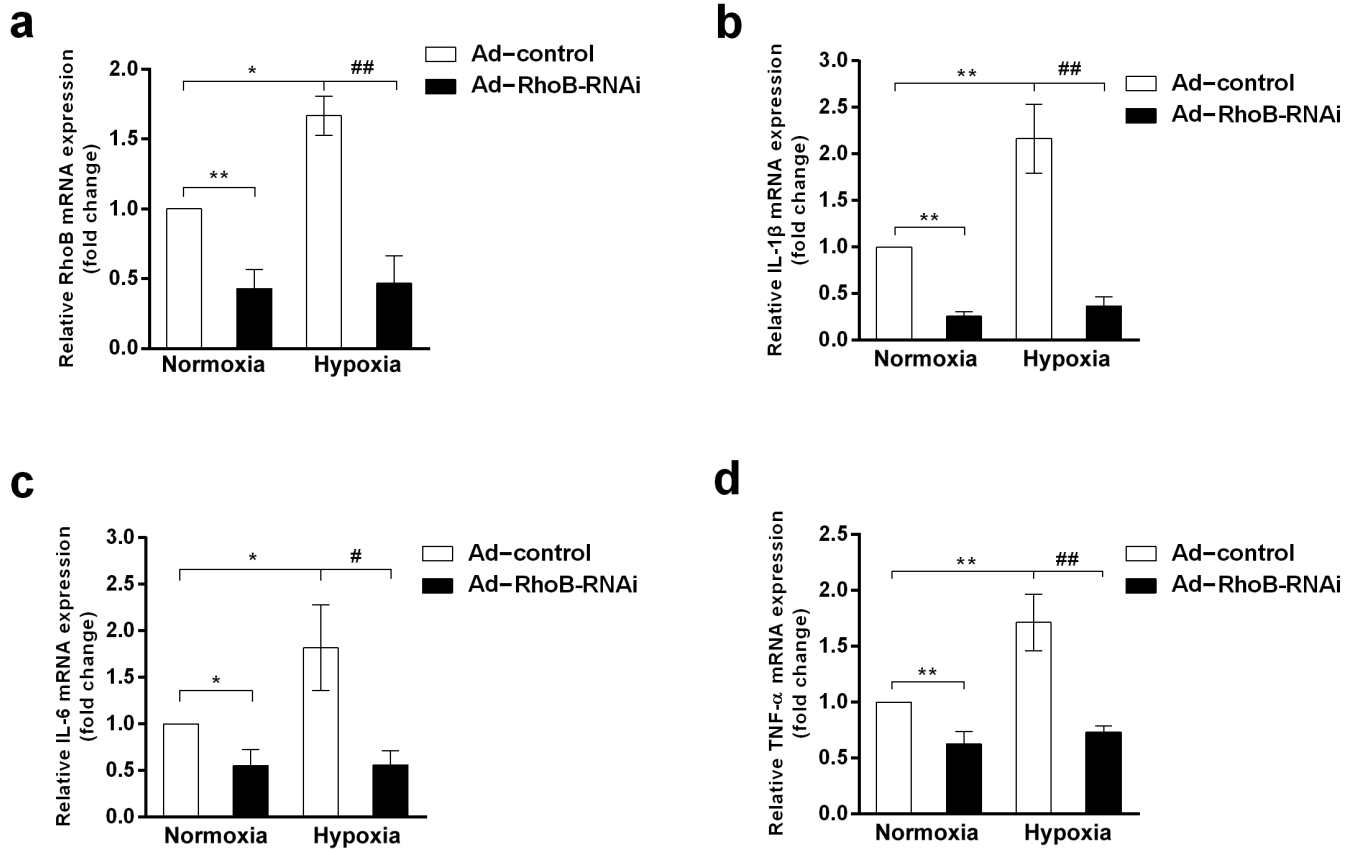

**Supplementary Figure S1** Effect of RhoB knockdown on proinflammatory cytokine induction by hypoxia in primary peritoneal macrophages. Primary peritoneal macrophages were infected by the indicated adenoviruses (MOI 1:100). After transfection for 36 h, cells were incubated in hypoxia (1% O<sub>2</sub>) or normoxia for another 12 h. Knockdown of RhoB expression was monitored at mRNA level (**a**), and the mRNA levels of IL-1 $\beta$  (**b**), IL-6 (**c**), and TNF- $\alpha$  (**d**) were assessed by qRT-PCR.  $\beta$ -actin was used as a normalization control for qRT-PCR. The values were expressed as fold over normoxic Ad-control and mean of three independent experiments. Each bar represents mean  $\pm$  SD. \* $P$  < 0.05, \*\* $P$  < 0.01 versus normoxic Ad-control, # $P$  < 0.05, ## $P$  < 0.01 versus hypoxic Ad-control.

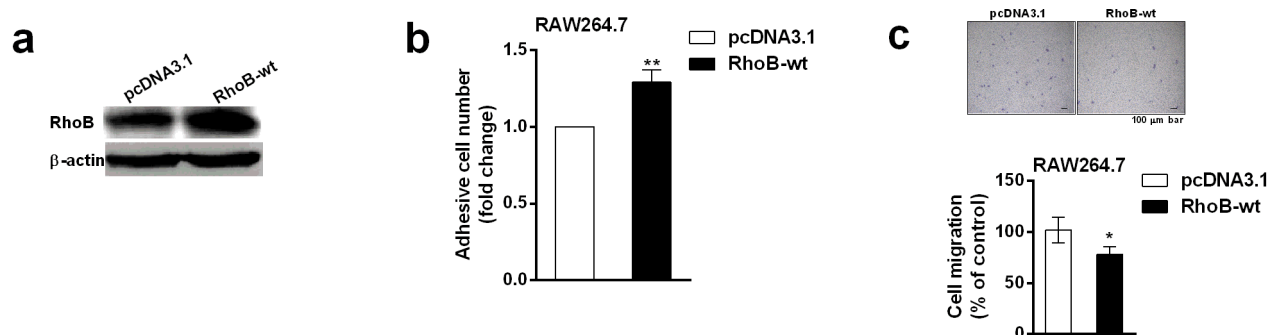

**Supplementary Figure S2** Effect of RhoB overexpression on cell adhesion and migration under normoxic condition in RAW264.7 cells. **(a)** Effect of RhoB-wt overexpression in RAW264.7 cells was confirmed by western blot after transfection with 4.0 μg indicated plasmids for 36 h. **(b)** After transient transfection for 36 h, cell adhesion assay was performed as described in the section “Material and Methods.” **(c)** After transient transfection for 36 h,  $8 \times 10^4$  cells were seeded into the upper transwell chambers and incubated in normoxia for another 20 h. Graph shown (upper) were representative images (100× magnification) of three independent experiments. Scale bar, 100 μm. The values were expressed as fold over control and mean of three independent experiments. Each bar represents mean  $\pm$  SD. \* $P < 0.05$ , \*\* $P < 0.01$  versus control plasmid.
